# Supplementary material
Source: PubMed Central journal article supplement (PMC3430319)
Supplement: JB.00950-12_zjb999091912so1.pdf [file JB.00950-12_zjb999091912so1.pdf]

Fig.S1

|            |       |             |           |            |            |            |            |            |             |           |            |
|------------|-------|-------------|-----------|------------|------------|------------|------------|------------|-------------|-----------|------------|
| N400       | (1)   | MKIVFITTTVA | SSIYGFRAV | IKKLIGKNHQ | VYAFVSEFSD | NELDIIREMG | VTPVTYRSNR | SGVNPFSDIK | STFLIFKALKK | ISPDLVFPY | FAKPVIFGTF |
| 053442     | (1)   | M-----      | -----I    | -----      | -----      | -----T     | -----      | -----L     | -----E      | -----     | -----      |
| 8013       | (1)   | M-----      | -----     | -----      | -----      | -----      | -----      | -----L     | -----E      | -----     | -----      |
| FAM18      | (1)   | M-----      | -----     | -----      | -----      | -----      | -----      | -----L     | -----E      | -----     | -----      |
| alpha14    | (1)   | M-----      | -----I    | -----      | -----      | -----T     | -----      | -----L     | -----E      | -----     | -----      |
| Z2491      | (1)   | M-----      | -----     | -----      | -----      | -----      | -----      | -----L     | -----E      | -----     | -----      |
| 961-5945   | (1)   | M-----      | -----     | -----      | -----      | -----      | -----      | -----L     | -----E      | -----     | -----      |
| M6190      | (1)   | M-----      | -----     | -----      | -----      | -----      | -----      | -----L     | -----E      | -----     | -----      |
| MC58       | (1)   | M-----      | -----     | -----      | -----      | -----      | -----      | -----L     | -----E      | -----     | -----      |
| ATCC13091  | (1)   | M-----      | -----     | -----      | -----      | -----      | -----      | -----L     | -----E      | -----     | -----      |
| FA19       | (1)   | M-----      | -----     | -----      | -----      | -----      | -----      | -----L     | -----E      | -----     | -----      |
| SK-93-1035 | (122) | M-----      | -----     | -----      | -----      | -----      | -----      | -----L     | -----E      | -----V    | -----      |
| ST-640     | (1)   | M-----      | -----I    | -----      | -----      | -----T     | -----      | -----L     | -----E      | -----     | -----      |
| ST-3787    | (1)   | M-----      | -----I    | -----      | -----      | -----      | -----      | -----L     | -----E      | -----     | -----      |
| FA1090     | (1)   | M-----      | -----     | -----      | -----      | -----      | -----      | -----L     | -----E      | -----     | -----      |
| SK-92-679  | (1)   | M-----      | -----     | -----      | -----      | -----      | -----      | -----L     | -----E      | -----V    | -----      |
| 35/02      | (1)   | M-----      | -----     | -----      | -----      | -----      | -----      | -----L     | -----E      | -----     | -----      |
| NCCP11945  | (34)  | M-----      | -----     | -----      | -----      | -----      | -----      | -----L     | -----E      | -----     | -----      |
| F62        | (34)  | M-----      | -----     | -----      | -----      | -----      | -----      | -----L     | -----E      | -----     | -----      |
| 1291       | (1)   | M-----      | -----     | -----      | -----      | -----      | -----      | -----L     | -----E      | -----V    | -----      |
| PID1       | (1)   | M-----      | -----     | -----      | -----      | -----      | -----      | -----L     | -----E      | -----     | -----      |
| PID332     | (1)   | M-----      | -----     | -----      | -----      | -----      | -----      | -----EL    | -----E      | -----     | -----      |

|            |       |            |            |            |            |            |            |            |            |            |            |
|------------|-------|------------|------------|------------|------------|------------|------------|------------|------------|------------|------------|
| N400       | (101) | AAKLAGVPRI | VGMLEGLGFA | FTPQPEGIPL | KTKIIKGILI | ALYRITLPLM | ESLIVLNPDD | KDELLHQYGI | KIKNIHILGG | IGLDLRQYPY | SEADIPDEKE |
| 053442     | (101) | -----      | -----      | -----      | -----      | -----A     | -----      | -----TDK   | -----      | -----S     | -----      |
| 8013       | (101) | -----      | -----      | -----      | -----      | -----H-A   | -----      | -----TDK   | -----      | -----      | -----      |
| FAM18      | (101) | -----      | -----      | -----      | -----      | -----A     | -----      | -----TDK   | -----      | -----      | -----      |
| alpha14    | (101) | -----      | -----      | -----      | -----      | -----H-A   | -----      | -----TDK   | -----      | -----      | -----      |
| Z2491      | (101) | -----      | -----      | -----      | -----      | -----T-A   | -----      | -----TDK   | -----      | -----      | -----      |
| 961-5945   | (101) | -----      | -----      | -----      | -----      | -----A     | -----      | -----TDK   | -----      | -----S     | -----      |
| M6190      | (101) | -----      | -----      | -----      | -----      | -----A     | -----      | -----TDK   | -----      | -----S     | -----      |
| MC58       | (101) | -----      | -----      | -----      | -----      | -----A     | -----      | -----TDK   | -----      | -----      | -----      |
| ATCC13091  | (101) | -----      | -----R     | -----      | -----      | -----A     | -----      | -----TDK   | -----      | -----      | -----      |
| FA19       | (101) | -----      | -----      | -----      | -----      | -----A     | -----      | -----TDK   | -----      | -----      | -----      |
| SK-93-1035 | (222) | -----      | -----      | -----      | -----      | -----A     | -----      | -----TDK   | -----      | -----S     | -----      |
| ST-640     | (101) | -----      | -----      | -----      | -----      | -----A     | -----      | -----D     | -----      | -----      | -----      |
| ST-3787    | (101) | -----      | -----      | -----      | -----      | -----A     | -----      | -----      | -----      | -----      | -----      |
| FA1090     | (101) | -----      | -----      | -----      | -----      | -----A     | -----      | -----      | -----      | -----      | -----      |
| SK-92-679  | (101) | -----      | -----      | -----      | -----      | -----      | -----      | -----      | -----      | -----      | -----      |
| 35/02      | (101) | -----      | -----      | -----      | -----      | -----      | -----      | -----      | -----      | -----      | -----      |
| NCCP11945  | (134) | -----      | -----      | -----      | -----      | -----      | -----      | -----      | -----      | -----      | -----      |
| F62        | (134) | -----      | -----      | -----      | -----      | -----      | -----      | -----      | -----      | -----      | -----      |
| 1291       | (101) | -----      | -----      | -----      | -----      | -----      | -----      | -----      | -----      | -----      | -----      |
| PID1       | (101) | -----      | -----      | -----      | -----      | -----      | -----      | -----      | -----      | -----      | -----      |
| PID332     | (101) | -----      | -----      | -----      | -----      | -----      | -----      | -----      | -----      | -----      | -----      |

|            |       |            |            |            |            |              |            |            |            |            |            |
|------------|-------|------------|------------|------------|------------|--------------|------------|------------|------------|------------|------------|
| N400       | (201) | PVKFLFIGRF | LKEKGIDDFI | RAAEQVKGKY | PDTVFTALGA | IDKPRGSG..   | .DLEQPAARD | IIRFPGFVNN | VSEVIKEHHI | FVLPSYYREG | VPRSTQEAMA |
| 053442     | (201) | -----      | -----      | -----D     | -----      | -----S-AG-GG | -----RL    | -----      | -----      | -----      | -----      |
| 8013       | (201) | -----      | -----      | -----D     | -----      | -----S-AG-.. | AIWNALPPAI | LSVSPVL    | -----      | -----      | -----      |
| 8013       | (1)   | -----      | -----      | -----      | -----      | -----        | -----      | -----      | -----      | -----      | M-         |
| FAM18      | (201) | -----      | -----      | -----D     | -----      | -----S-AG-G. | AIWNALPPAI | LSVSPVL    | -----      | -----      | M-         |
| FAM18      | (1)   | -----      | -----      | -----      | -----      | -----        | -----      | -----      | -----      | -----      | M-         |
| alpha14    | (201) | -----      | -----      | -----D     | -----      | -----S-AG-G. | -----RL    | -----      | -----      | -----      | -----      |
| Z2491      | (201) | -----      | -----      | -----D     | -----      | -----S-G-GG  | -----RL    | -----      | -----      | -----      | -----      |
| 961-5945   | (201) | -----      | -----      | -----D     | -----      | -----S-G-GG  | G-----RL   | -----      | -----      | -----      | -----      |
| M6190      | (201) | -----      | -----      | -----D     | -----      | -----S-G-GG  | -----RL    | -----      | -----      | -----      | -----      |
| MC58       | (201) | -----      | -----      | -----D     | -----      | -----S-G-G.  | -----RL    | -----      | -----      | -----      | -----      |
| ATCC13091  | (201) | -----      | -----      | -----D     | -----      | -----S-.GG   | AIWNGLPPAI | LSVS-VL    | -----      | -----      | -----      |
| ATCC13091  | (1)   | -----      | -----      | -----      | -----      | -----        | -----      | -----      | M-----A    | -----      | -----      |
| FA19       | (201) | -----      | -----      | -----      | -----      | -----S-RG-GG | GGFRTLYRPR | YYP--R-CEQ | CFRSD-GASY | IRIAVL     | -----      |
| SK-93-1035 | (322) | -----      | -----      | -----W     | -----E-I-V | -----S-AG-GG | GGFRTLYR-R | YYP--R-CKQ | CFRSNQGAPY | IRIAVLL    | -----      |
| SK-93-1035 | (1)   | -----      | -----      | -----      | -----      | -----        | -----      | -----      | -----      | -----      | M-         |
| ST-640     | (201) | -----      | -----      | -----D     | -----      | -----S-..GG  | AIWNALPPAI | LSVS-VLWTM | FPK        | -----      | -----      |
| ST-640     | (1)   | -----      | -----      | -----      | -----      | -----        | -----      | -----      | -----      | -----      | M-         |
| ST-3787    | (201) | -----L     | -----      | -----D     | -----      | -----S-..GG  | AIWNALPPAI | LSVS-VLWTM | FPK        | -----      | -----      |
| ST-3787    | (1)   | -----      | -----      | -----      | -----      | -----        | -----      | -----      | M-----A    | -----      | -----      |
| FA1090     | (201) | -----      | -----      | -----      | -----      | -----S-G-G.  | -----RFI   | -----      | -----A     | -----      | -----      |
| SK-92-679  | (201) | -----      | -----      | -----      | -----      | -----S-G-G.  | -----RFI   | -----      | -----A     | -----      | -----      |
| 35/02      | (201) | -----      | -----      | -----      | -----      | -----        | -----      | -----      | -----      | -----      | -----      |
| NCCP11945  | (234) | -----      | -----      | -----      | -----      | -----        | -----      | -----      | -----      | -----      | -----      |
| F62        | (234) | -----      | -----      | -----      | -----      | -----        | -----      | -----      | -----M     | -----      | -----      |
| 1291       | (201) | -----      | -----      | -----E     | -----      | -----        | -----      | -----      | -----M     | -----      | -----      |
| PID1       | (201) | -----      | -----      | -----E     | -----      | -----        | -----      | -----      | -----M     | -----      | -----      |
| PID332     | (201) | -----      | -----      | -----E     | -----      | -----        | -----      | -----      | -----M     | -----      | -----      |

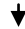

|            |       |            |             |            |            |            |            |            |          |       |       |
|------------|-------|------------|-------------|------------|------------|------------|------------|------------|----------|-------|-------|
| N400       | (298) | VGRAVITTDV | PGCRETVA DK | VNGFLIEPWN | PRILAEKMIY | FIENRAAVRL | MGNASYAIAK | DKFDAEKVDL | KFLDILKA | ----- | ----- |
| 053442     | (300) | -----      | -----       | -----      | -----      | -----E     | -----      | -----      | -----L   | ----- | ----- |
| 8013       | (299) | -----      | -----       | -----      | -----      | -----E     | -----      | -----      | -----L   | ----- | ----- |
| FAM18      | (3)   | -----      | -----       | -----      | -----      | -----E     | -----      | -----      | -----L   | ----- | ----- |
| alpha14    | (298) | -----      | -----       | -----      | -----      | -----E-I   | -----      | -----      | -----L   | ----- | ----- |
| Z2491      | (300) | -----      | -----       | -----      | -----      | -----E-I   | -----      | -----      | -----L   | ----- | ----- |
| 961-5945   | (301) | -----      | -----       | -----      | -----      | -----E     | -----      | -----      | -----L   | ----- | ----- |
| M6190      | (300) | -----      | -----       | -----      | -----      | -----E     | -----      | -----      | -----L   | ----- | ----- |
| MC58       | (299) | -----      | -----       | -----      | -----      | -----E     | -----      | -----      | -----L   | ----- | ----- |
| ATCC13091  | (33)  | -----      | -----       | -----      | -----      | -----E     | -----      | -----      | -----L   | ----- | ----- |
| SK-93-1035 | (3)   | -----      | -----       | -----      | -----      | -----E     | -----      | -----      | -----L   | ----- | ----- |
| ST-640     | (3)   | -----      | -----       | -----      | -----      | -----E-I   | -----      | -----      | -----L   | ----- | ----- |
| ST-3787    | (28)  | -----      | -----       | -----      | -----      | -----E     | -----      | -----      | -----L   | ----- | ----- |
| FA1090     | (299) | -----      | -----       | -----      | -----      | -----E     | -----      | -----      | -----L   | ----- | ----- |
| SK-92-679  | (298) | -----      | -----       | -----      | -----      | -----E     | -----      | -----      | -----L   | ----- | ----- |
| 35/02      | (298) | -----      | -----       | -----      | -----      | -----      | -----      | -----      | -----L   | ----- | ----- |
| NCCP11945  | (332) | -----      | -----       | -----      | -----      | -----      | -----      | -----      | -----L   | ----- | ----- |
| F62        | (332) | -----      | -----       | -----      | -----      | -----      | -----      | -----      | -----L   | ----- | ----- |
| 1291       | (298) | -----      | -----       | -----      | -----      | -----      | -----      | -----      | -----L   | ----- | ----- |
| PID1       | (298) | -----      | -----       | -----      | -----      | -----      | -----      | -----      | -----L   | ----- | ----- |
| PID332     | (298) | -----      | -----       | -----      | -----      | -----      | -----      | -----      | -----L   | ----- | ----- |

### **Fig. S1. Amino acid sequence alignment of PglA proteins**

PglA from N400 was used as consensus sequence. Amino acids differences are shown in red and identical amino acids are represented by minus signs. The critical amino acid, alanine 350, in FA1090 is boxed. Alignment was made with AlignX in Vector NTI Advance 11 (Invitrogen) that uses a modified ClustalW algorithm (24). *N. gonorrhoeae* strains are shown in black (N400, FA19, SK-93-1035, FA1090, SK-92-679, 35/02, NCCP11946, F62, 1291, PID1, PID332). *N. meningitidis* strains are shown in green (05332, 8013, FAM18, alpha14, Z2491, 961-5945, M6140, MC58, ATCC13031). *N. lactamica* strains are shown in blue (ST-640, ST-3787). The strains 8013, FAM18, ST-640 and ST3787 were in a phase off configuration but nevertheless show some PglA activity (Fig. 6).

Fig.S2

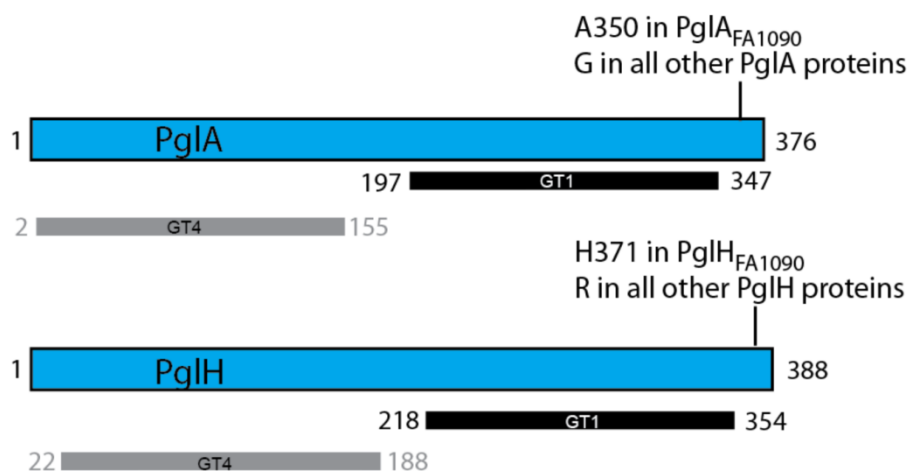

**Fig. S2. The PglA and PglH glycosyltransferase family domains**

Cartoon of the PglA (376 aa) and PglH (388 aa) glycosyltransferases in blue. The CAZy glycosyltransferase family 1 (GT1) domains are shown below in black and were identified by searching the Pfam database using PglA<sub>FA1090</sub> and PglH<sub>FA1090</sub> sequences (22). The CAZy glycosyltransferase family 4 (GT4) domains were also identified by searching Pfam and are shown below in grey, although it was insignificant for PglH<sub>FA1090</sub>. The position of alanine 350 in PglA<sub>FA1090</sub> and histidine 371 in PglH<sub>FA1090</sub> are shown.

Table S1. *Neisseria* strains and *pgl* genotypes

|                                                                | Accession nr                   | <i>pglG</i> | <i>pglH</i> | <i>pglA</i> | polyG | <i>pglE</i> | <i>pglB</i>  | Origin |
|----------------------------------------------------------------|--------------------------------|-------------|-------------|-------------|-------|-------------|--------------|--------|
| <b><i>Neisseria gonorrhoeae</i></b>                            |                                |             |             |             |       |             |              |        |
| FA1090                                                         | <a href="#">NC_002946.2</a>    | ON          | ON          | ON          | 11G   | ON (-PV)    | <i>pglB</i>  | DGI    |
| F62                                                            | <a href="#">ADAA01000005.1</a> | ON          | ON          | ON (-PV)    | 4G    | ON (-PV)    | <i>pglB</i>  | UI     |
| PID1                                                           | <a href="#">ABZM01000034.1</a> | OFF         | ON (-PV)    | ON (-PV)    | 4G    | OFF         | <i>pglB</i>  | PID    |
| FA6140                                                         | <a href="#">ABZI01000024.1</a> | OFF         | ON (-PV)    | OFF         | 16G   | ON          | <i>pglB</i>  | ES     |
| PID24-1                                                        | <a href="#">ABZN01000022.1</a> | OFF         | ON (-PV)    | OFF         | 11G   | OFF         | <i>pglB</i>  | PID    |
| DGI18                                                          | <a href="#">ABZH01000024.1</a> | OFF         | ON (-PV)    | OFF         | 13G   | OFF         | <i>pglB</i>  | DGI    |
| PID332                                                         | <a href="#">ABZO01000041.1</a> | OFF         | ON          | ON (-PV)    | 4G    | OFF         | <i>pglB</i>  | PID    |
| 35/02                                                          | <a href="#">ABZG01000029.1</a> | OFF         | ON (-PV)    | ON (-PV)    | 4G    | OFF         | <i>pglB</i>  |        |
| SK-93-1035                                                     | <a href="#">ABZQ01000041.1</a> | ON          | ON (-PV)    | OFF         | 15G   | OFF         | <i>pglB</i>  | DGI    |
| SK-92-679                                                      | <a href="#">ABZP01000038.1</a> | OFF         | ON (-PV)    | ON          | 11G   | OFF         | <i>pglB</i>  | DGI    |
| FA19                                                           | <a href="#">ABZI01000029.1</a> | OFF         | ON (-PV)    | OFF         | 16G   | OFF         | <i>pglB</i>  | UI     |
| PID18                                                          | <a href="#">ABZL01000024.1</a> | OFF         | ON          | ON (-PV)    | 4G    | OFF         | <i>pglB</i>  | PID    |
| DGI2                                                           | <a href="#">ACIG01000103.1</a> | OFF         | ON (-PV)    | ON (-PV)    | 4G    | OFF         | <i>pglB</i>  | DGI    |
| MS11                                                           | <a href="#">ABZK01000025.1</a> | -           | -           | ON (-PV)    | 4G    | OFF         | <i>pglB</i>  | UI     |
| NCCP11945                                                      | <a href="#">NC_011035.1</a>    | -           | -           | ON (-PV)    | 4G    | OFF         | <i>pglB</i>  |        |
| 1291                                                           | <a href="#">ABZF01000025.1</a> | -           | -           | ON (-PV)    | 4G    | OFF         | <i>pglB</i>  | GU     |
| <b><i>Neisseria lactamica</i></b>                              |                                |             |             |             |       |             |              |        |
| ST-3787/ATCC 23970                                             | <a href="#">ACEQ02000033.1</a> | OFF         | OFF         | ON          | 8G    | ON          | <i>pglB</i>  | C      |
| ST-640                                                         | <a href="#">NC_014752.1</a>    | OFF         | ON          | OFF         | 10G   | ON          | <i>pglB</i>  | C      |
| Y92-1009                                                       | <a href="#">CACLO1000022.1</a> | OFF         | ON          | ON          | 11G   | OFF         | <i>pglB</i>  | C      |
| NS19                                                           | <a href="#">AEP101000013.1</a> | OFF         | OFF         | OFF         | 11G   | OFF         | <i>pglB</i>  | C      |
| <b><i>Neisseria meningitidis</i></b>                           |                                |             |             |             |       |             |              |        |
| H44/76                                                         | <a href="#">AEQZ01000037.1</a> | -           | -           | ON          | 11G   | OFF         | <i>pglB</i>  | IMD    |
| MC58                                                           | <a href="#">NC_003112.2</a>    | -           | -           | ON          | 11G   | OFF         | <i>pglB</i>  | IMD    |
| ATCC 13091                                                     | <a href="#">AEEF01000085.1</a> | ON          | OFF         | OFF         | 13G   | OFF         | <i>pglB</i>  |        |
| K1207                                                          | <a href="#">ADWM01000120.1</a> | OFF         | ON (-PV)    | ON          | 11G   | OFF         | <i>pglB2</i> | IMD    |
| S0108                                                          | <a href="#">ADWN01000126.1</a> | ON          | ON (-PV)    | OFF         | 13G   | OFF         | <i>pglB2</i> | IMD    |
| Z2491                                                          | <a href="#">NC_003116.1</a>    | OFF         | ON          | ON          | 14G   | ON          | <i>pglB</i>  | IMD    |
| 053442                                                         | <a href="#">NC_010120.1</a>    | ON          | OFF         | ON          | 12G   | OFF         | <i>pglB2</i> | IMD    |
| NS44                                                           | <a href="#">AEPJ01000151.1</a> | ON          | OFF         | ON          | 8G    | OFF         | <i>pglB2</i> |        |
| FAM18                                                          | <a href="#">NC_008767.1</a>    | OFF         | ON (-PV)    | OFF         | 11G   | OFF         | <i>pglB2</i> | IMD    |
| ALPHA14                                                        | <a href="#">NC_013016.1</a>    | OFF         | ON (-PV)    | ON          | 9G    | OFF         | <i>pglB</i>  | HC     |
| 8013                                                           | FM999788                       | -           | -           | OFF         | 8G    | OFF         | <i>pglB2</i> | IMD    |
| M6190                                                          | <a href="#">AEQF01000040.1</a> | OFF         | ON (-PV)    | ON          | 14G   | OFF         | <i>pglB2</i> | IMD    |
| ES14902                                                        | <a href="#">AEQI01000038.1</a> | OFF         | ON (-PV)    | ON          | 14G   | OFF         | <i>pglB2</i> | IMD    |
| M0579                                                          | <a href="#">AEQH01000026.1</a> | OFF         | OFF         | OFF         | 9G    | OFF         | <i>pglB2</i> | IMD    |
| OX99.30304                                                     | <a href="#">AEQE01000110.1</a> | OFF         | OFF         | OFF         | 10G   | OFF         | <i>pglB2</i> | HC     |
| 961-5945                                                       | <a href="#">AEQK01000132.1</a> | ON          | ON          | ON          | 17G   | ON          | <i>pglB2</i> | IMD    |
| M13399                                                         | <a href="#">AEQG01000039.1</a> | -           | -           | ON          | 11G   | OFF         | <i>pglB</i>  | IMD    |
| N1568                                                          | <a href="#">AEQD01000080.1</a> | -           | -           | OFF         | 11G   | OFF         | <i>pglB2</i> | IMD    |
| CU385                                                          | <a href="#">AEQJ01000044.1</a> | -           | -           | ON          | 11G   | OFF         | <i>pglB</i>  | IMD    |
| M01-240013                                                     | <a href="#">AEQL01000047.1</a> | -           | -           | OFF         | 10G   | ON          | <i>pglB</i>  | IMD    |
| <b><i>Neisseria flavescens</i> NRL30031/H210</b>               |                                |             |             |             |       |             |              |        |
| <i>Neisseria flavescens</i> SK114                              | <a href="#">ACQV01000018.1</a> | ON          | ON (-PV)    | -           | -     | -           | <i>pglB2</i> | C      |
| <i>Neisseria subflava</i> NJ9703                               | <a href="#">ACEO02000013.1</a> | ON          | ON (-PV)    | -           | -     | -           | <i>pglB2</i> | C      |
| <i>Neisseria mucosa</i> C102                                   | <a href="#">ACRG01000017.1</a> | ON          | ON (-PV)    | -           | -     | -           | <i>pglB2</i> | C      |
| <i>Neisseria mucosa</i> ATCC 25996                             | <a href="#">ACDX02000011.1</a> | ON          | ON (-PV)    | -           | -     | -           | <i>pglB2</i> | C      |
| <i>Neisseria sicca</i> DS1                                     | <a href="#">AEPG01000397.1</a> | ON          | ON (-PV)    | -           | -     | -           | <i>pglB2</i> | C      |
| <i>Neisseria sicca</i> 4320                                    | <a href="#">AEPF01000056.1</a> | ON          | ON (-PV)    | -           | -     | -           | <i>pglB2</i> | C      |
| <i>Neisseria sicca</i> ATCC 29256                              | <a href="#">ACKO02000014.1</a> | ON          | ON (-PV)    | -           | -     | -           | <i>pglB2</i> | C      |
| <i>Neisseria polysaccharea</i> NS342                           | <a href="#">AEPH01000240.1</a> | ON          | ON (-PV)    | -           | -     | OFF         | <i>pglB</i>  | C      |
| <i>Neisseria polysaccharea</i> ATCC 43768                      | <a href="#">ADBE01000085.1</a> | -           | -           | OFF         | 10G   | ON          | <i>pglB</i>  | C      |
| <i>Neisseria cinerea</i> ATCC 14685                            | <a href="#">ACDY02000005.1</a> | ON          | ON (-PV)    | -           | -     | -           | <i>pglB</i>  | C      |
| <i>Neisseria</i> sp. oral taxon 014 str. F0314                 | <a href="#">ADEA01000027.1</a> | ON          | ON (-PV)    | -           | -     | -           | <i>pglB2</i> | C      |
| <i>Neisseria elongata</i> subsp. <i>glycolytica</i> ATCC 29315 | <a href="#">ADBF01000031.1</a> | ON          | OFF         | -           | -     | -           | <i>pglB</i>  | C      |
| <i>Neisseria bacilliformis</i> ATCC BAA-1200                   | AFAY01000015.1                 | ON          | ON (-PV)    | -           | -     | -           | <i>pglB</i>  | C      |

(-PV), not phase variable; DGI, Disseminated Gonococcal Infection; UI, Uncomplicated Infection; PID, Pelvic Inflammatory Disease; ES, Epidemic strain; GU, Gonococcal Urethritis; IMD, Invasive Meningococcal Disease; HC, healthy carrier; C, Commensal strain.

Table S2. QuikChange primers

| AA mutations               | Primers       | Sequence 5'-3'                                      |
|----------------------------|---------------|-----------------------------------------------------|
| <b>FA1090</b>              |               |                                                     |
| SRGGGG → PRGSG             | PRGS-f        | GGGCGCAATCGACAAACCACGCGGGAGCGGGGATTTAGAACGCTTTATCG  |
|                            | PRGS-r        | CGATAAAGCGTTCTAAATCCCCGCTCCCGCGTGGTTTGTTCGATTGCGCCC |
| RFI → QPA                  | QPA-f         | GGGGGGGGGAGATTTAGAACAGCCTGCCGCCCGCGATATTATCCG       |
|                            | QPA-r         | CGGATAATATCGCGGGCGGCAGGCTGTTCTAAATCTCCCCCCCC        |
| GGGG → GSG                 | GSG-f         | CGACAAATCACGCGGGAGCGGAGATTTAGAACGC                  |
|                            | GSG-r         | GCGTTCTAAATCTCCGCTCCCGCGTGATTGTTCG                  |
| SRGGGGDLERFI → PRGSGDLEQPA | PRGSGDLEQPA-f | CGCGGGAGCGGGGATTTAGAACAGCCTGCCGCCCGCGATATTATCCG     |
|                            | PRGSGDLEQPA-r | CGGATAATATCGCGGGCGGCAGGCTGTTCTAAATCCCCGCTCCCGCG     |
| A → E                      | A275E-f       | CAATGTTTCCGAAGTGATAAAGGAACATCATATATTCGTATTGCCGTC    |
|                            | A275E-r       | GACGGCAATACGAATATATGATGTTCTTTATCACTTCGGAAACATTG     |
| A → T                      | A146T-f       | GCCCTGTACCGCATTACCCTGCCGATG                         |
|                            | A146T-r       | CATCGGCAGGGTAATGCGGTACAGGGC                         |
| A → G                      | A350G-f       | CCGTCCGCTGATGGGGAATGCAAGTTATGC                      |
|                            | A350G-t       | GCATAACTTGCATTCCCATCAGGCGGACG                       |
| <b>N400</b>                |               |                                                     |
| G → A                      | G350A-f       | CCGTCCGCTGATGGCGAATGCAAGTTATGC                      |
|                            | G350A-r       | GCATAACTTGCATTCCCATCAGGCGGACGG                      |
| GSG → GGGG                 | GGGG-f        | CGCAATCGACAAACCACGCGGGGGGGGGGAGATTTGGAACAGCCTGCC    |
|                            | GGGG-r        | GGCAGGCTGTTCCAAATCTCCCCCCCCCGCGTGGTTTGTTCGATGCG     |
| E → A                      | E275A-f       | CAATGTTTCCGAAGTGATAAAGCGCATCATATATTCGTATTGCCGTC     |
|                            | E275A-r       | GACGGCAATACGAATATATGATGCGCTTTTATCACTTCGGAAACATTG    |
